# Supplementary material for: Pillar[5]arenes with an introverted amino group: a hydrogen bonding tuning effect
Source: Royal Society of Chemistry journal article supplement (doi:10.1039/c2ob27044g), 2012-11-07
Supplement: c2ob27044g.pdf [file c2ob27044g.pdf]

## Electronic Supplementary Information

# Pillar[5]arenes with an introverted amino group: a hydrogen bonding tuning effect

Lei Chen, Zhiming Li, Zhenxia Chen, Jun-Li Hou\*

Department of chemistry, Fudan University, Shanghai, 200433, P. R. China.

E-mail: houjl@fudan.edu.cn

### Contents

|                                                                                                            |     |
|------------------------------------------------------------------------------------------------------------|-----|
| 1. General                                                                                                 | S2  |
| 2. Synthetic procedure and characterization data for <b>1</b> and <b>2</b>                                 | S2  |
| 3. Synthetic procedure and characterization data for authentic sample of <b>IP-DA-3</b> and <b>IP-MA-3</b> | S4  |
| 4. Kinetic experiments for measurement the reaction rate constants                                         | S8  |
| 5. Full <sup>1</sup> H NMR spectra of <b>IP-DA-n</b> and <b>IP-MA-n</b>                                    | S12 |
| 6. Reference                                                                                               | S12 |

### 1. General:

$^1\text{H}$  and  $^{13}\text{C}$  NMR spectra were recorded at 400 MHz with a Mercury plus 400 spectrometer at 298 K. Chemical shifts were referenced to  $\text{CHCl}_3$  residue (7.26 ppm for  $^1\text{H}$  NMR, 77.0 ppm for  $^{13}\text{C}$  NMR). Mass spectra were recorded with Bruker MicroTOF II spectrometer. For single crystal growing, **IP-DA-3** (3 mg) was dissolved in chloroform (0.3 ml). The single crystals were obtained by slow evaporation the solutions under 25 °C for 2 weeks. The data set was treated with the SQUEEZE program to remove highly disordered solvent molecules. The crystallographic formulae include the number of solvent molecules suggested by the SQUEEZE program.

### 2. Synthetic procedure and characterization data for 1 and 2:

Compound **2** was synthesized according to our earlier work.<sup>[1]</sup>  $^1\text{H}$  NMR ( $\text{CDCl}_3$ , 400 MHz):  $\delta$  7.03-6.99 (m, 8 H), 6.92 (s, 1 H), 6.84 (s, 1 H), 4.55-4.90 (m, 20 H), 4.09-3.84 (m, 28 H), 1.06-0.80 (m, 27 H). HR-MS (ESI-TOF): Calcd. for  $\text{C}_{73}\text{H}_{86}\text{O}_{30}\text{Na}$ : 1465.5102. Found: 1465.4522.

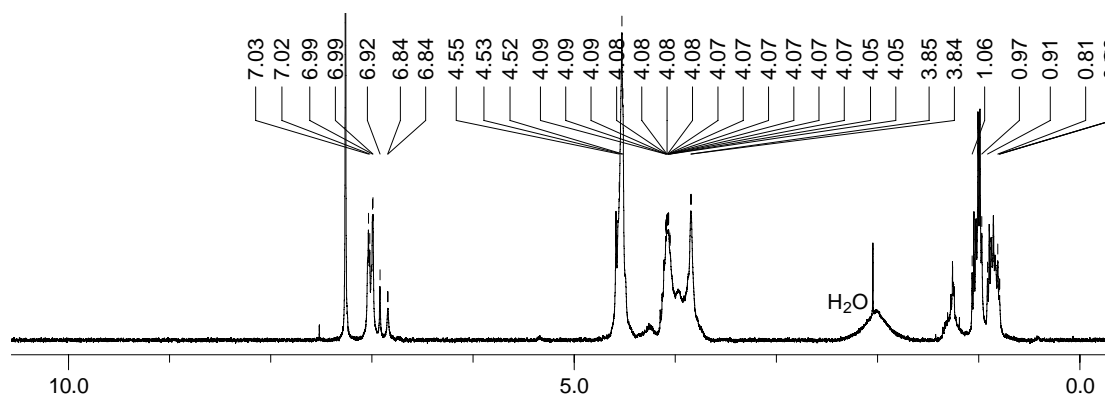

**Figure S1.**  $^1\text{H}$  NMR spectrum of **2** in  $\text{CDCl}_3$ .

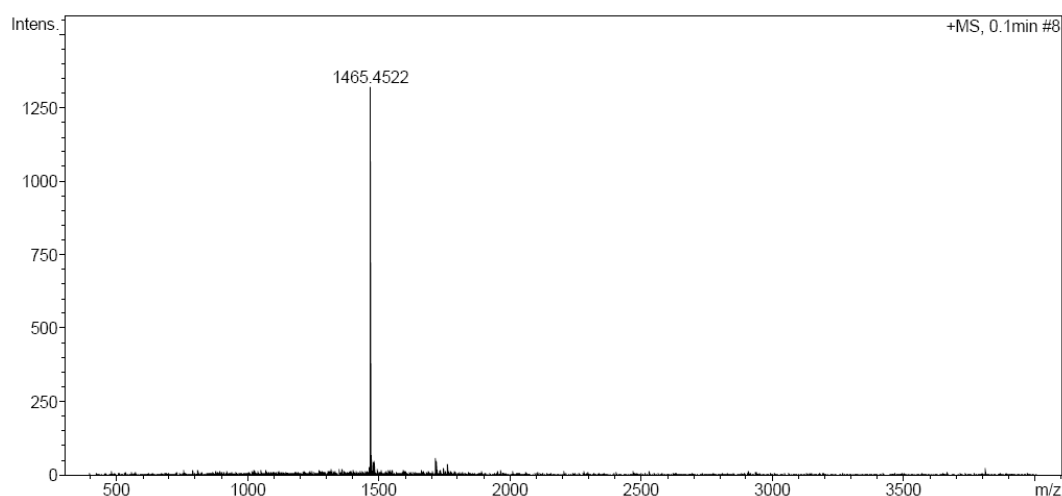

**Figure S2.** HR ESI-MS of **2**.

To the solution of **2** (200 mg, 0.14 mmol) in CH<sub>2</sub>Cl<sub>2</sub> (8 mL) was added oxalyl chloride (96 μL, 1.12 mmol) and DMF (2 μL). The mixture was stirred at 25 °C for 3 h and then subject to distill under reduced pressure. The residue was redissolved in anhydrous CH<sub>2</sub>Cl<sub>2</sub> (2 mL), and then phenol (40 mg, 0.42 mmol) and anhydrous pyridine (67 μL, 0.84 mmol) was added to such a solution. After stirred at 25 °C for 12 h, the mixture was washed with saturated Na<sub>2</sub>CO<sub>3</sub> and aqueous HCl (5%). The crude product was purified by column chromatography (CH<sub>2</sub>Cl<sub>2</sub>/EtOAc = 40/1) to give **1** as white solid (88 mg, 42%). <sup>1</sup>H NMR (CDCl<sub>3</sub>, 400 MHz): δ 7.39 (t, *J* = 7.2 Hz, 1 H), 7.17-7.04 (m, 14 H), 4.82 (q, *J* = 14.8 Hz, 1 H), 4.53 (m, 19 H), 4.07 (m, 18 H), 3.87 (m, 10 H), 0.97-0.91 (m, 24), 0.69 (t, *J* = 6.4 Hz, 3 H). <sup>13</sup>C NMR (CDCl<sub>3</sub>, 100 MHz): δ 169.4, 168.1, 150.4, 149.3, 149.1, 149.0, 148.9, 148.7, 129.5, 129.1, 128.9, 128.7, 128.6, 126.1, 121.5, 114.8, 114.7, 114.6, 114.5, 114.4, 114.2, 66.0, 65.9, 65.7, 61.0, 60.8, 29.6, 29.4, 29.1, 29.0, 13.9, 13.8, 13.6. MS (ESI): *m/z* 1541 [M+Na]<sup>+</sup>, HR-MS (ESI-TOF): Calcd. for C<sub>79</sub>H<sub>90</sub>O<sub>30</sub>Na: 1541.5415. Found: 1541.5425.

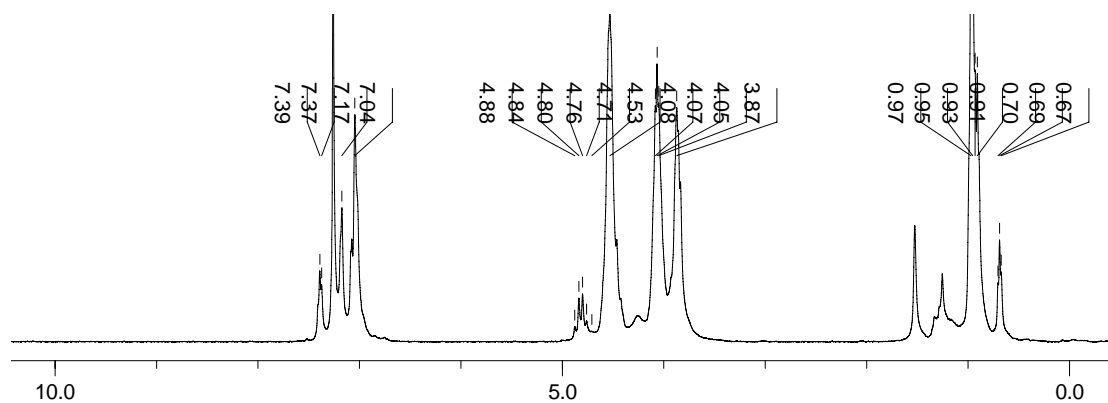

Figure S3. <sup>1</sup>H NMR spectrum of **1** in CDCl<sub>3</sub>.

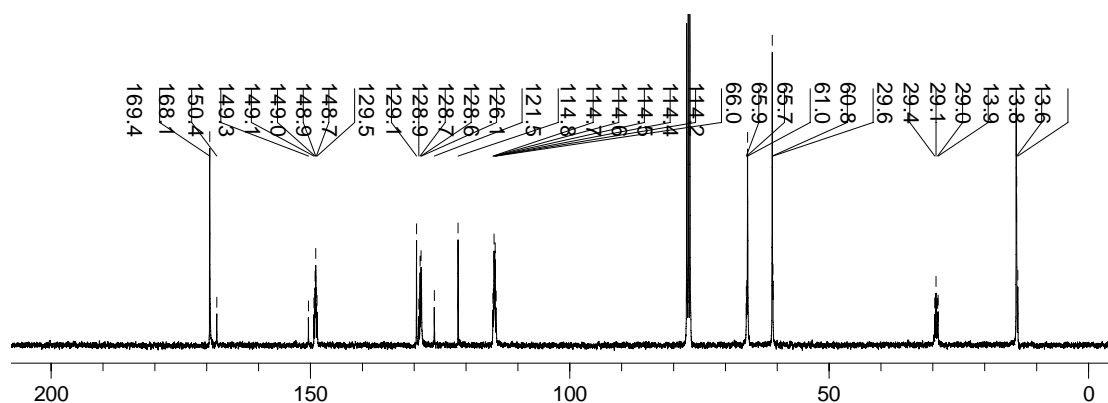

Figure S4. <sup>13</sup>C NMR spectrum of **1** in CDCl<sub>3</sub>.

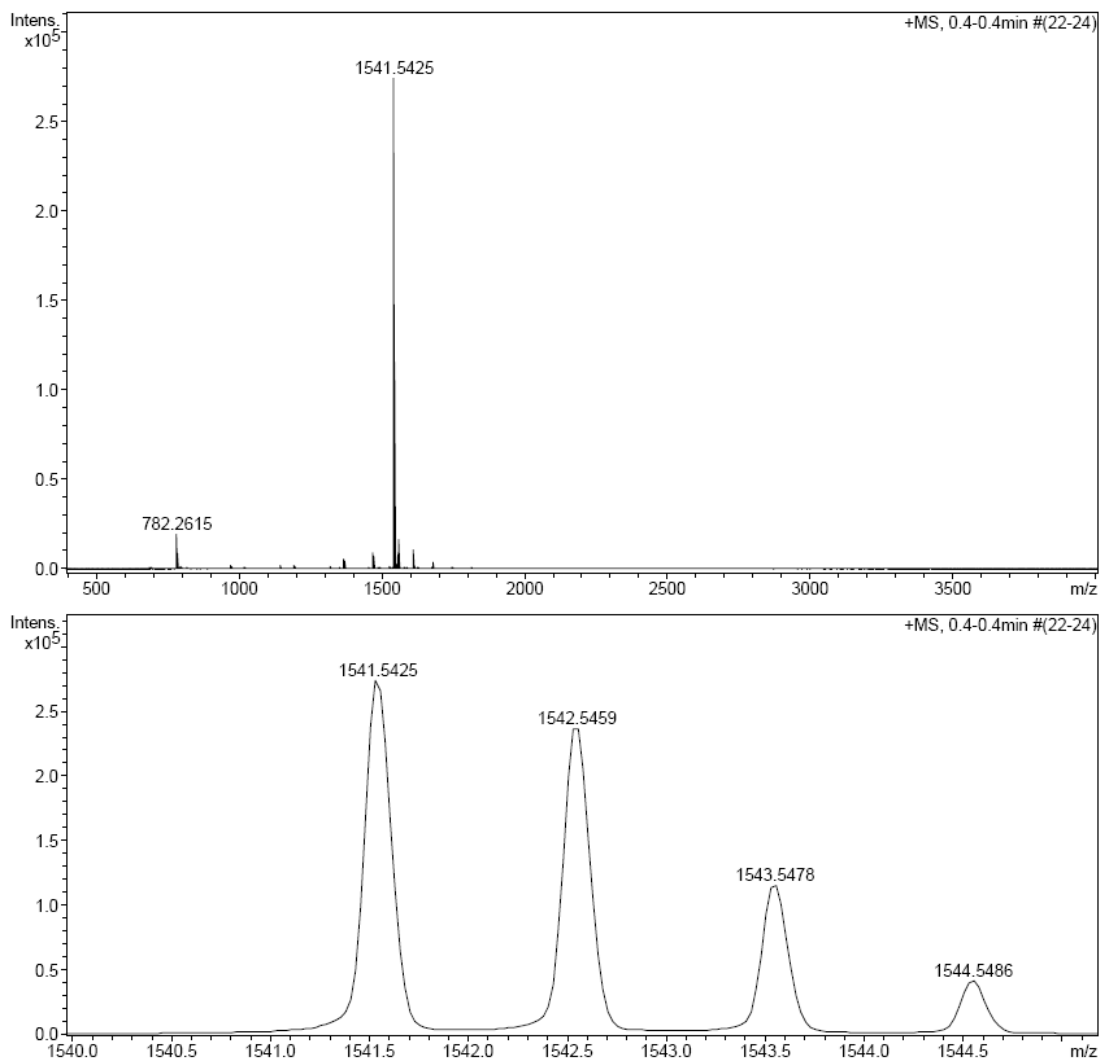

**Figure S5.** HR ESI-MS of **1**.

### **3. Synthetic procedure and characterization data for authentic sample of IP-DA-3 and IP-MA-3:**

General procedure for the synthesis of **IP-DA-3** and **IP-MA-3**: To the solution of **2** (100 mg, 0.07 mmol) in  $\text{CH}_2\text{Cl}_2$  (5 mL) was added oxalyl chloride (48  $\mu\text{L}$ , 0.56) and DMF (2  $\mu\text{L}$ ). The mixture was stirred at 25 °C for 3 h and then subject to distill under reduced pressure. The residue was redissolved in anhydrous  $\text{CH}_2\text{Cl}_2$  (2 mL), and then **DA-3** or **MA-3** (0.70 mmol) and anhydrous pyridine (67  $\mu\text{L}$ , 0.84 mmol) was added to such a solution. After stirred at 25 °C for 5 h, the mixture was washed with aqueous HCl (5%). The crude product was purified by column chromatography to give **IP-DA-3** or **IP-MA-3** as white solid.

**IP-DA-3** (35%)  $^1\text{H}$  NMR ( $\text{CDCl}_3$ , 400 MHz):  $\delta$  7.19-6.74 (m, 10 H), 5.92 (br, 1 H), 4.51-3.64 (m, 49 H), 2.45 (br, 1 H), 1.12-1.08 (m, 27 H), -0.42 (br, 2 H), -0.69 (br, 1 H), -0.83 (br, 1 H).  $^{13}\text{C}$  NMR ( $\text{CDCl}_3$ , 100 MHz):  $\delta$  169.6-168.0 (m), 149.2-148.3 (m),

129.9-127.1 (m), 115.4-113.6 (m), 66.2-65.4 (m), 61.4-61.0 (m), 30.2-28.5 (m), 14.2.  
MS (ESI):  $m/z$  1499  $[M+H]^+$ , HR-MS (ESI-TOF): Calcd. for  $C_{76}H_{95}O_{29}N_2$ : 1499.6021.  
Found: 1499.6000.

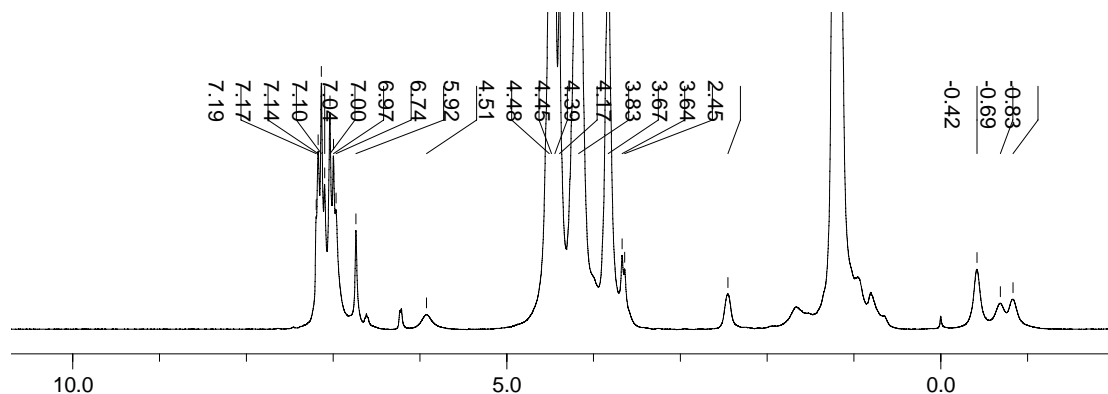

**Figure S6.**  $^1H$  NMR spectrum of **IP-DA-3** in  $CDCl_3$ .

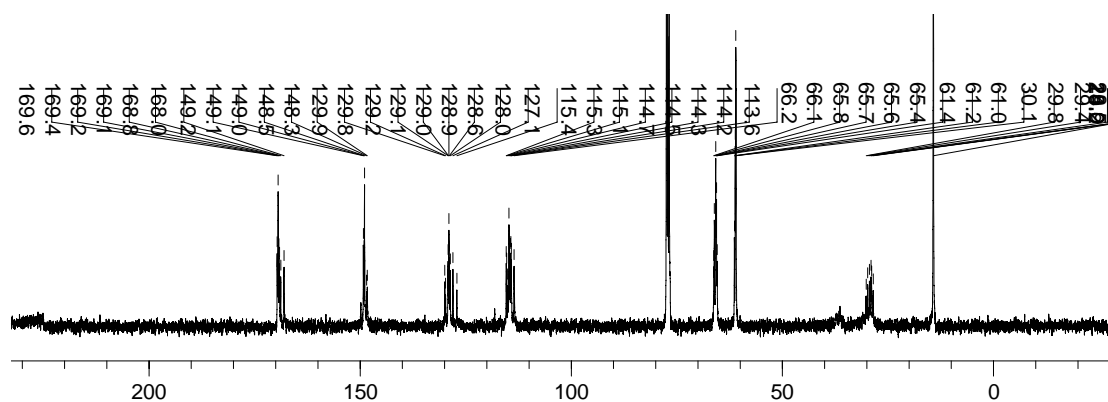

**Figure S7.**  $^{13}C$  NMR spectrum of **IP-DA-3** in  $CDCl_3$ .

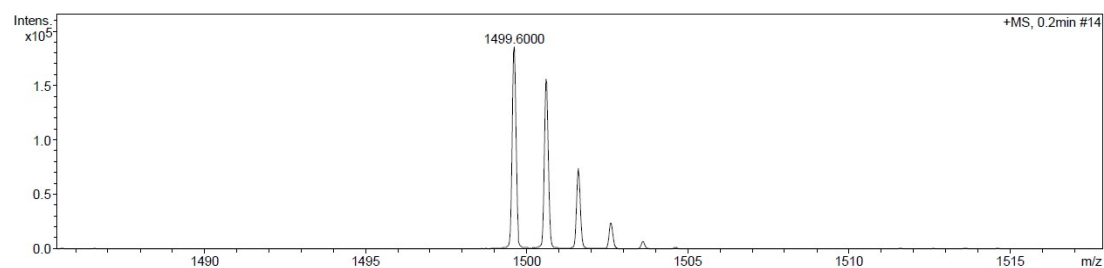

**Figure S8.** HR ESI-MS of **IP-DA-3**.

**IP-MA-3** (48%)  $^1H$  NMR ( $CDCl_3$ , 400 MHz):  $\delta$  7.14-6.71 (m, 10 H), 5.70 (br, 1 H), 4.54-3.87 (m, 48 H), 2.67 (br, 1 H), 2.09 (br, 1 H), 1.14-1.10 (m, 27 H), -0.02 (br, 2 H), -0.74 (br, 3 H).  $^{13}C$  NMR ( $CDCl_3$ , 100 MHz):  $\delta$  169.6-168.4 (m), 149.6-148.5 (m), 129.9-127.6 (m), 115.4-113.5 (m), 66.1-65.6 (m), 61.3-61.0 (m), 39.8, 30.0-28.8 (m), 21.1, 14.1, 9.4. MS (ESI):  $m/z$  1484  $[M+H]^+$ , HR-MS (ESI-TOF): Calcd. for  $C_{76}H_{94}O_{29}N$ : 1484.5912. Found: 1484.5916.



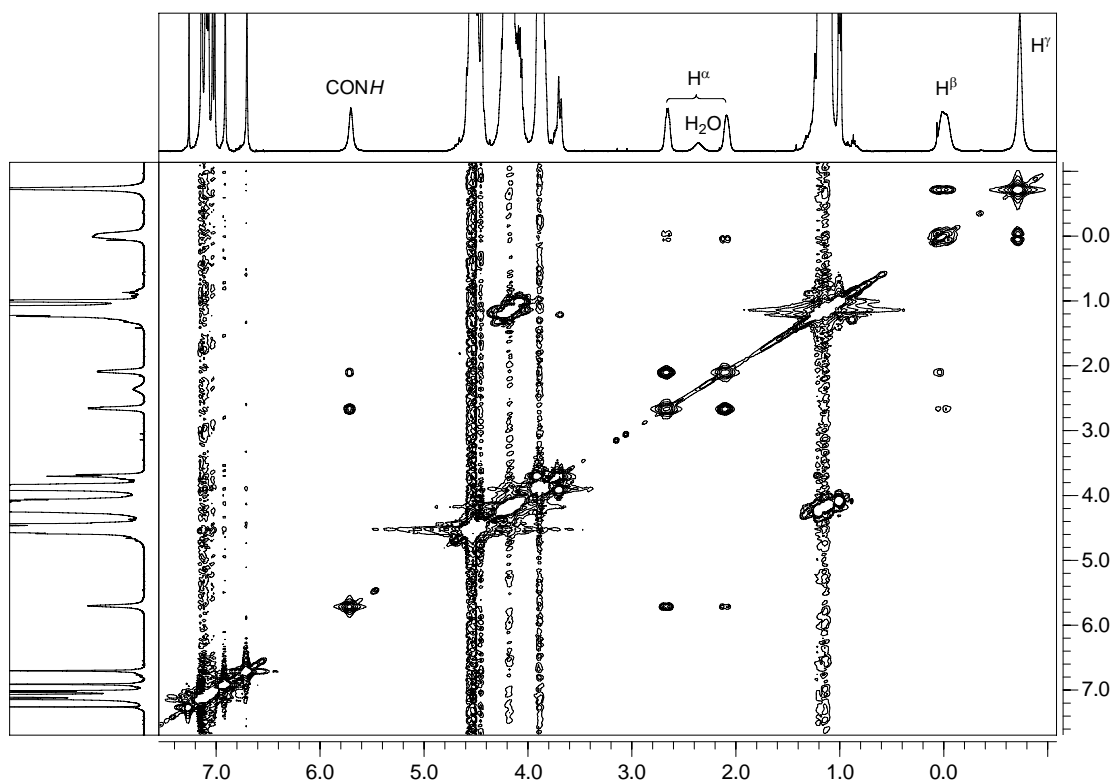

**Figure S12.** 2D COSY  $^1\text{H}$  NMR spectrum of IP-MA-3 (10 mM) in  $\text{CDCl}_3$ .

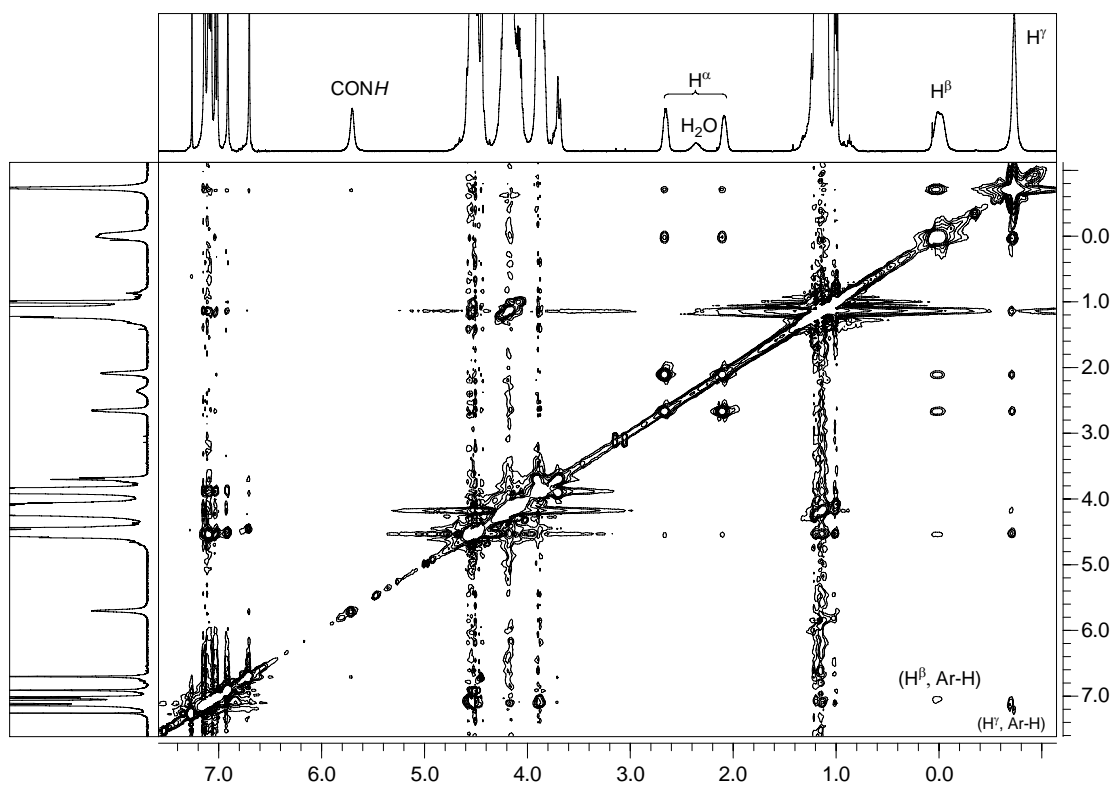

**Figure S13.** 2D NOESY  $^1\text{H}$  NMR spectrum (mixing time = 0.6 s) of IP-MA-3 (10 mM) in  $\text{CDCl}_3$ .

#### 4. Kinetic experiments for measurement the reaction rate constants:

For the kinetic experiments, **1** ( $[1_0] = 4.0$  mM) and **DA-n** (80 mM) or **MA-n** (160 mM) was dissolved in  $\text{CDCl}_3$ . The reactions were then monitored by  $^1\text{H}$  NMR. The ratio of **1** and introverted pillar[5]arene or phenol in the reaction mixture was determined by their integration and thus the concentration of **1** ( $[1]$ ) could be calculated. By fitting the values of  $\ln([1_0]/[1])$  or  $\ln([3_0]/[3])$  versus time plots with a linear model, the reaction rate constants ( $k$ s) were obtained, which equal to the slop of the line.

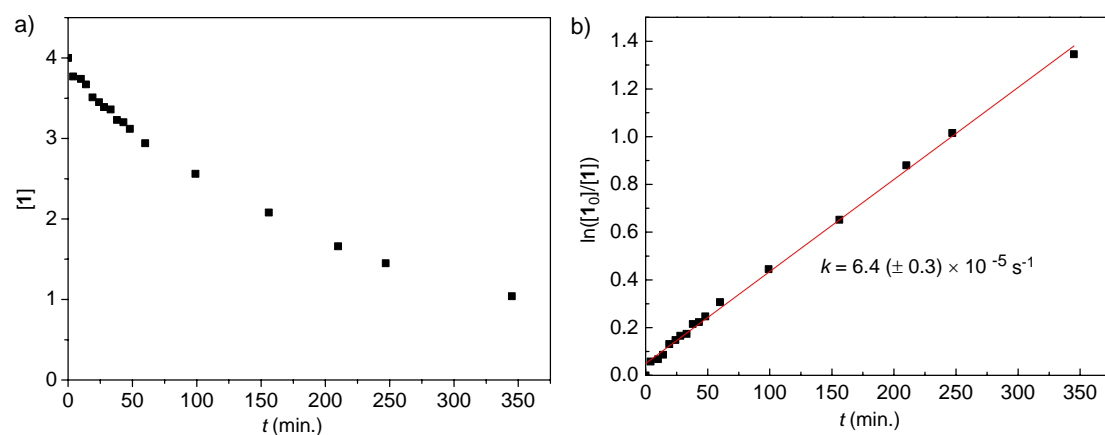

**Figure S14.** (a) Changes in  $[1]$  and (b)  $\ln([1_0]/[1])$  of the reaction mixture with time ( $t$ ) after mixing of **1** and **DA-2** in  $\text{CDCl}_3$ . The solid line represents the linear simulation of measured data points.

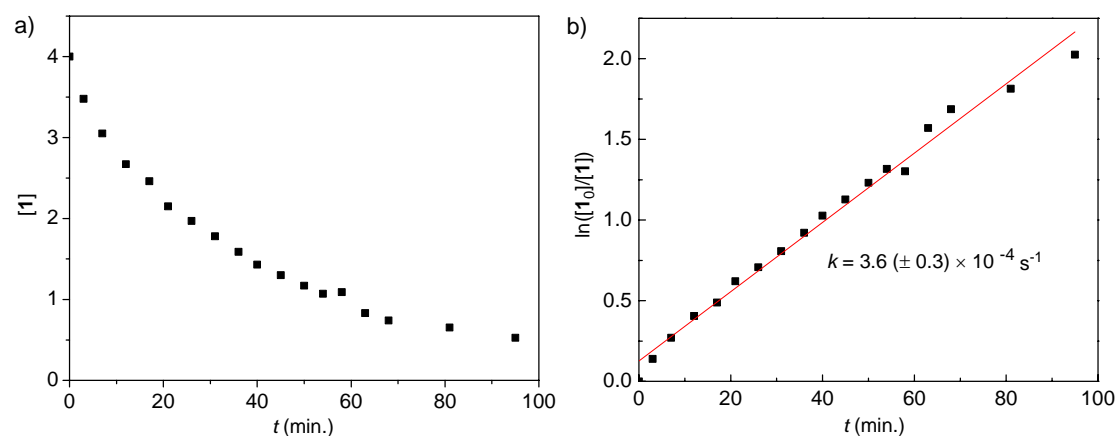

**Figure S15.** (a) Changes in  $[1]$  and (b)  $\ln([1_0]/[1])$  of the reaction mixture with time ( $t$ ) after mixing of **1** and **DA-3** in  $\text{CDCl}_3$ . The solid line represents the linear simulation of measured data points.



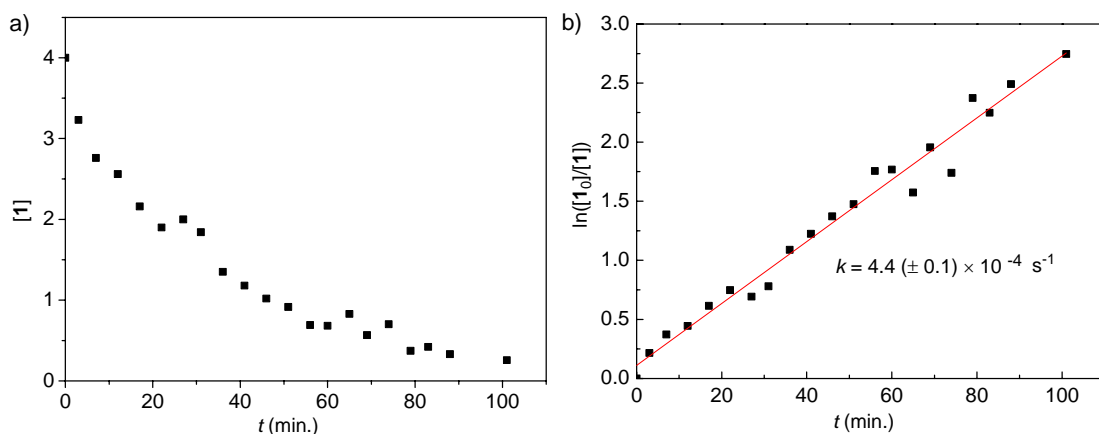

**Figure S16.** (a) Changes in **[1]** and (b)  $\ln([1]_0/[1])$  of the reaction mixture with time ( $t$ ) after mixing of **1** and **DA-4** in  $\text{CDCl}_3$ . The solid line represents the linear simulation of measured data points.

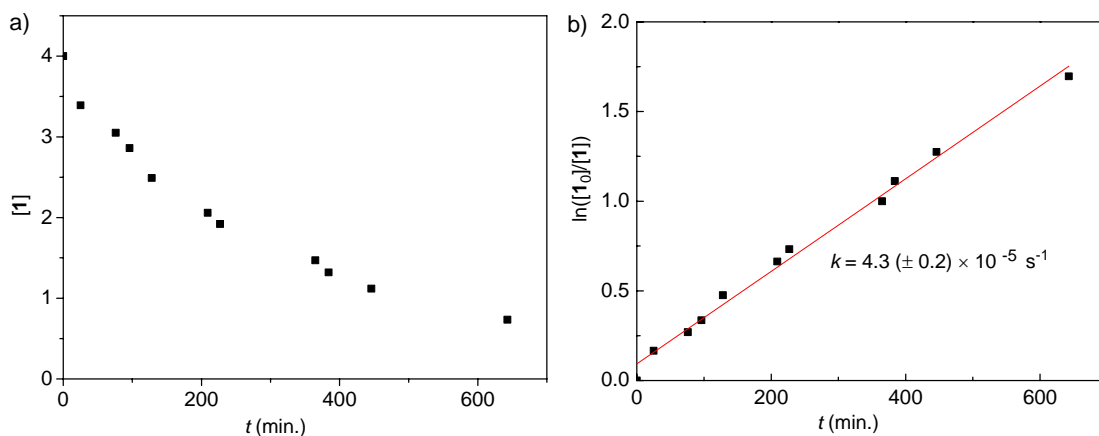

**Figure S17.** (a) Changes in **[1]** and (b)  $\ln([1]_0/[1])$  of the reaction mixture with time ( $t$ ) after mixing of **1** and **DA-5** in  $\text{CDCl}_3$ . The solid line represents the linear simulation of measured data points.

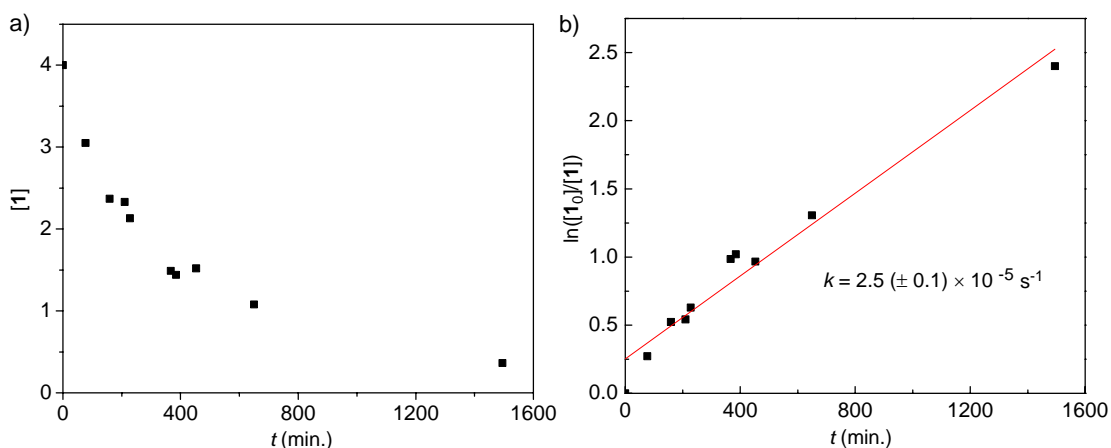

**Figure S18.** (a) Changes in **[1]** and (b)  $\ln([1]_0/[1])$  of the reaction mixture with time ( $t$ ) after mixing of **1** and **DA-6** in  $\text{CDCl}_3$ . The solid line represents the linear simulation of measured data points.

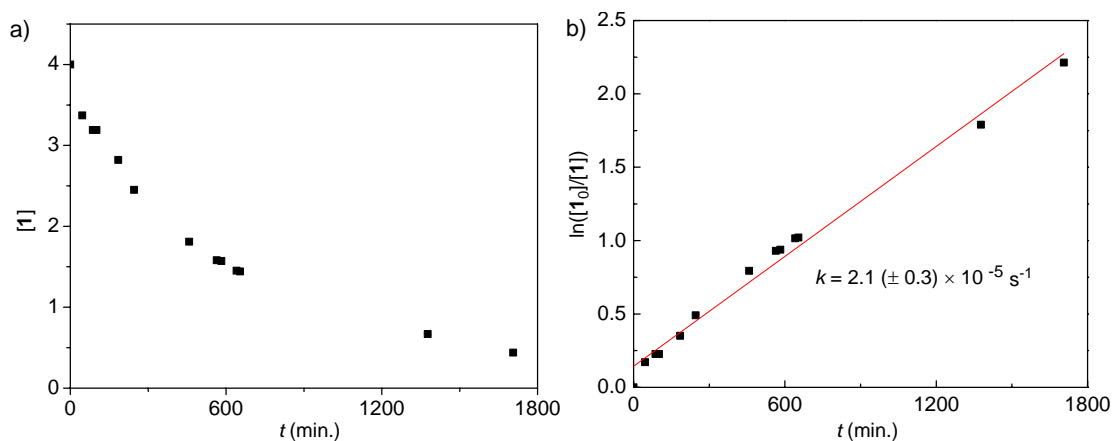

**Figure S19.** (a) Changes in **[1]** and (b)  $\ln([1_0]/[1])$  of the reaction mixture with time ( $t$ ) after mixing of **1** and **DA-7** in  $\text{CDCl}_3$ . The solid line represents the linear simulation of measured data points.

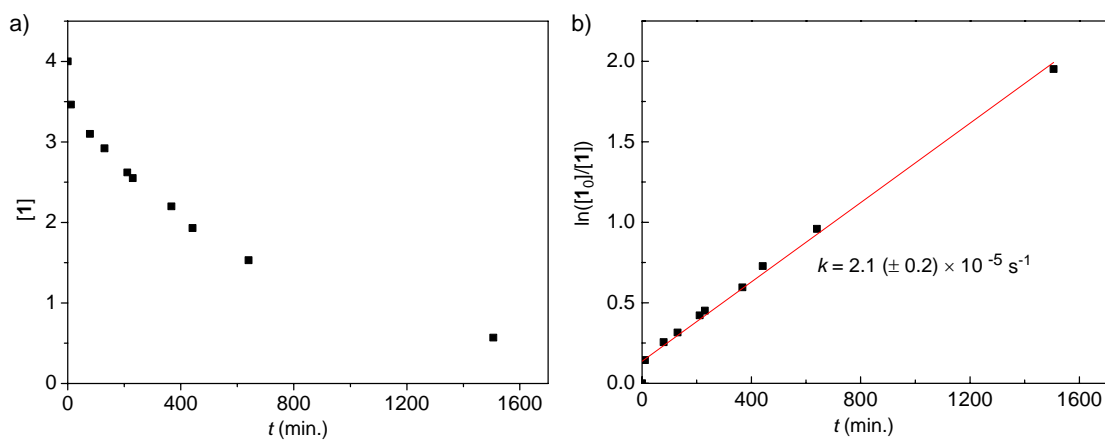

**Figure S20.** (a) Changes in **[1]** and (b)  $\ln([1_0]/[1])$  of the reaction mixture with time ( $t$ ) after mixing of **1** and **MA-3** in  $\text{CDCl}_3$ . The solid line represents the linear simulation of measured data points.

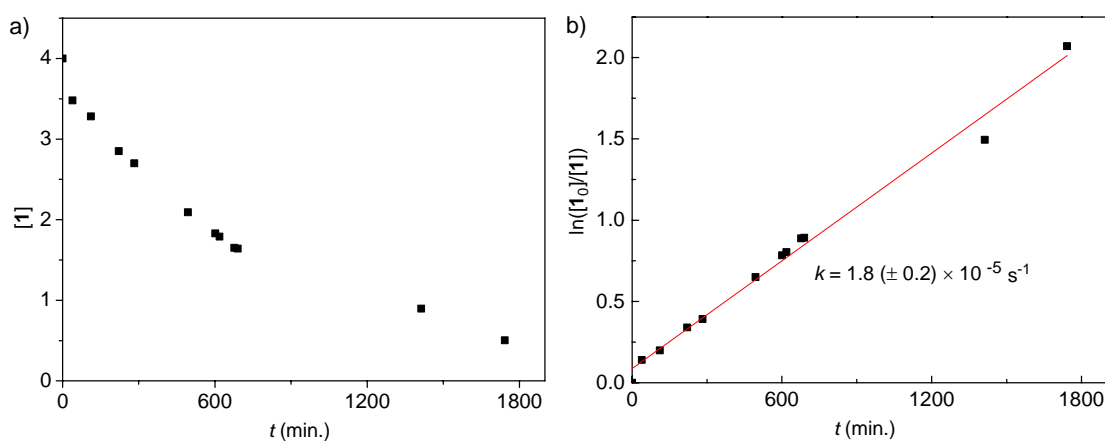

**Figure S21.** (a) Changes in **[1]** and (b)  $\ln([1_0]/[1])$  of the reaction mixture with time ( $t$ ) after mixing of **1** and **MA-4** in  $\text{CDCl}_3$ . The solid line represents the linear simulation of measured data points.

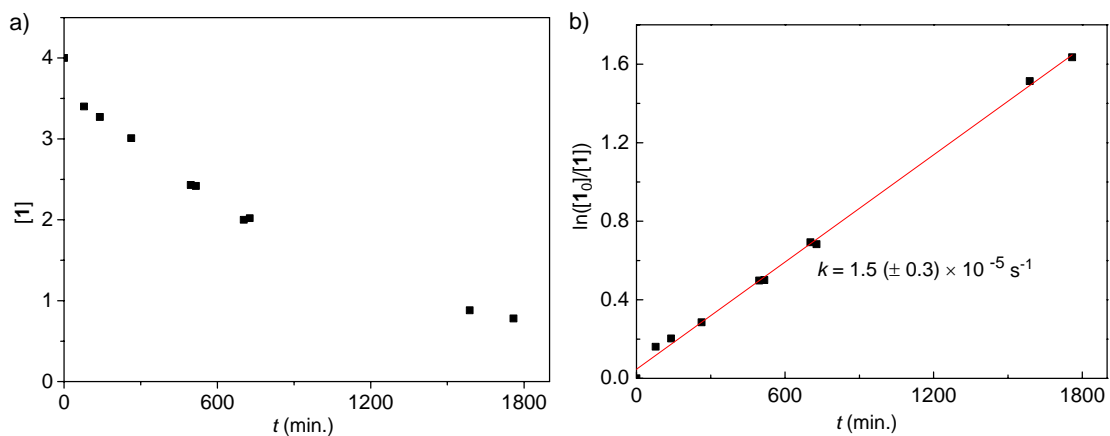

**Figure S22.** (a) Changes in **[1]** and (b)  $\ln([1]_0/[1])$  of the reaction mixture with time ( $t$ ) after mixing of **1** and MA-6 in  $\text{CDCl}_3$ . The solid line represents the linear simulation of measured data points.

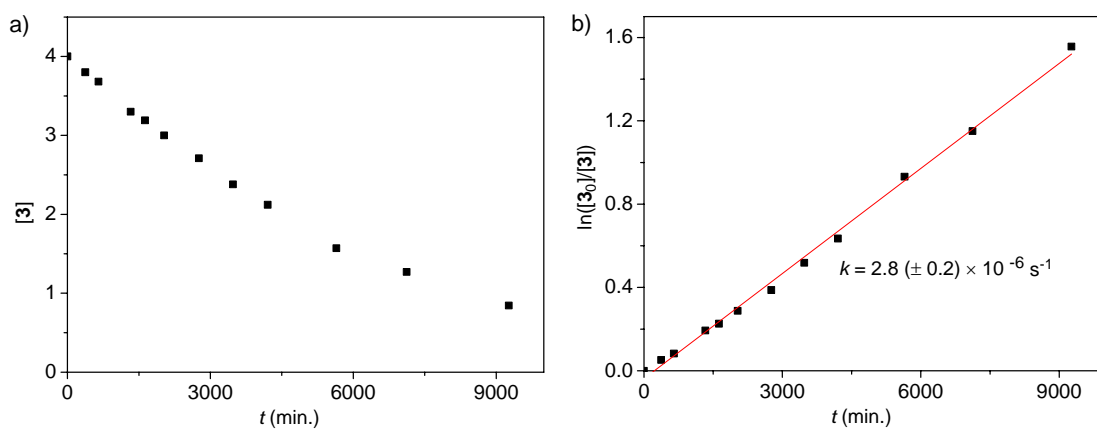

**Figure S23.** (a) Changes in **[3]** and (b)  $\ln([3]_0/[3])$  of the reaction mixture with time ( $t$ ) after mixing of **3** and MA-3 in  $\text{CDCl}_3$ . The solid line represents the linear simulation of measured data points.

### 5. Full $^1\text{H}$ NMR spectra of IP-DA-n and IP-MA-n:

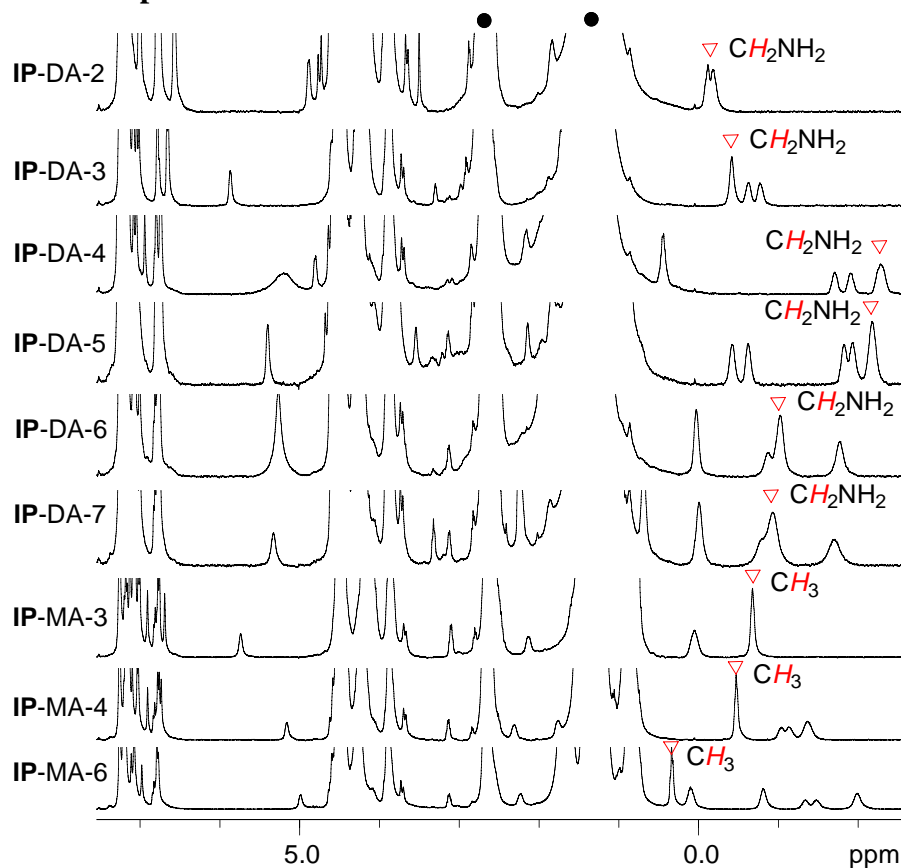

**Figure S24.**  $^1\text{H}$  NMR spectra of IP-DA-n ( $n = 2-7$ ) and IP-MA-n ( $n = 3, 4, 6$ ) produced in situ by the reaction of **1** with DA-n and MA-n. • indicates the signals from the excess DA-n or MA-n. The assignment of the proton signals of  $\text{CH}_2\text{NH}_2$  and  $\text{CH}_3$  based on their integration and non-anisotropic properties.

### 6. Reference

- [1] W. Si, L. Chen, X.-B. Hu, G. Tang, Z. Chen, J.-L. Hou, Z.-T. Li, *Angew. Chem. Int. Ed.* **2011**, *50*, 12564-12568.
